# Supplementary material for: Bacteria related to Bradyrhizobium yuanmingense from Ghana are effective groundnut micro-symbionts
Source: PubMed Central journal article supplement (PMC5989812; doi:10.1016/j.apsoil.2018.03.003), 2018-06
Supplement: mmc1.pdf [file mmc1.pdf]

**Applied Soil Ecology**

**SUPPLEMENTARY MATERIAL**

**Title: Bacteria related to *Bradyrhizobium yuanmingense* from Ghana are effective  
groundnut micro-symbionts**

Authors: Ophelia Osei, Robert C. Abaidoo, Benjamin. D. K. Ahiabor, Robert M. Boddey and Luc

F. M. Rouws

**Table S1**

Principal component analysis explaining the variation between variables

|   | Eigen Value | Percent of Variance | Cumulative Percentage |
|---|-------------|---------------------|-----------------------|
| 1 | 3.36        | <b>84.1</b>         | 84.05                 |
| 2 | 0.42        | <b>10.5</b>         | <b>94.5</b>           |
| 3 | 0.20        | 5.052               | 99.6                  |
| 4 | 0.016       | 0.421               | 100.0                 |

**Table S2**<sup>15</sup>N enrichment and proportion of nitrogen derived from air (%Ndfa) of groundnut and reference plant

| Isolate/strain/reference plant | Atom % <sup>15</sup> N excess | % Ndfa calculated using sorghum as the non-N <sub>2</sub> - fixing reference plant |
|--------------------------------|-------------------------------|------------------------------------------------------------------------------------|
| KNUST 1001                     | 0.00592 c                     | 91.8 a                                                                             |
| KNUST 1002                     | 0.00872 c                     | 87.8 a                                                                             |
| KNUST 1003                     | 0.00613 c                     | 91.4 a                                                                             |
| KNUST 1004                     | 0.00550 c                     | 92.3 a                                                                             |
| KNUST 1005                     | 0.00664 c                     | 90.8 a                                                                             |
| KNUST 1006                     | 0.00551 c                     | 92.3 a                                                                             |
| KNUST 1007                     | 0.00661 c                     | 90.7 a                                                                             |

|                |           |        |
|----------------|-----------|--------|
| Non-inoculated | 0.00692 c | 90.2 a |
| BR 10254       | 0.00594 c | 91.7 a |
| BR 3267        | 0.00536 c | 92.5 a |
| 32H1           | 0.00601 c | 91.5 a |
| SEMIA 6144     | 0.00542 c | 92.4 a |
| <hr/>          |           |        |
| Sorghum        | 0.07125 b | -      |
| NN Soybean     | 0.18750 a | -      |
| NN Common bean | 0.20574 a | -      |
| <hr/>          |           |        |
| CV (%)         | 48.8      |        |
| <hr/>          |           |        |

Means in the same column followed by the same letter are not significantly different at  $P < 0.05$  (Scott Knott Test).

**Table S3**

Morpho-cultural characteristics of effective isolates

| Isolates   | Days to single | pH reaction | Colony     | Colony transparency/Colour | Mucus    |
|------------|----------------|-------------|------------|----------------------------|----------|
|            | colony(C)      |             | morphology |                            | produced |
|            | appearance     |             |            |                            |          |
| KNUST 1001 | 6              | Alkaline    | Circular   | Opaque/ White              | Less     |
| KNUST 1002 | 7              | Alkaline    | Circular   | Opaque/ White              | Less     |
| KNUST 1003 | 3              | Acidic      | Circular   | Translucent/ Yellow        | More     |
| KNUST 1004 | 7              | Alkaline    | Irregular  | Opaque/ White              | Less     |
| KNUST 1005 | 7              | Alkaline    | Circular   | Opaque/ White              | Less     |
| KNUST 1006 | 7              | Alkaline    | Circular   | Opaque/ White              | Less     |
| KNUST 1007 | 3              | Acidic      | Circular   | Translucent/ Yellow        | More     |

**Table S4**

Percentage nucleotide similarity at different genetic loci between already described *Bradyrhizobium* strains and isolates from this study. The last column shows values for concatenated sequences of two loci. Similarity values were determined using the Mega 7 software. -: data not available

| Strains/ genes                                              | 16S rRNA | ITS    | <i>nodC</i> | <i>nifH</i> | 16S rRNA, ITS |
|-------------------------------------------------------------|----------|--------|-------------|-------------|---------------|
| <i>Bradyrhizobium yuanmingense</i> CCBAU 10071 <sup>T</sup> |          |        |             |             |               |
| KNUST 1001                                                  | 99.75%   | 97.52% | 89.74%      | 92.54%      | 99.05%        |
| KNUST 1002                                                  | 99.59%   | 97.88% | 89.74%      | 92.54%      | 99.16%        |
| KNUST 1004                                                  | 99.59%   | 97.89% | 90.28%      | 92.19%      | 99.16%        |
| KNUST 1005                                                  | 99.75%   | 99.83% | 94.33%      | 96.62%      | 99.78%        |
| KNUST 1006                                                  | 99.43%   | 98.59% | 90.03%      | 92.19%      | 99.33%        |
| <i>Bradyrhizobium yuanmingense</i> BR3267                   | 99.26%   | -      | 89.25%      | 93.12%      | -             |
| <i>Bradyrhizobium japonicum</i> SEMIA 6144 <sup>T</sup>     | 98.60%   | -      | 86.29%      | -           | -             |
| <i>Bradyrhizobium</i> sp. BR 10254 <sup>T</sup>             | 98.68%   | -      | -           | -           | -             |
| <i>Bradyrhizobium arachidis</i> CCBAU 051107 <sup>T</sup>   | 98.85%   | 98.24% | 85.43%      | 91.88%      | 98.66%        |
| <i>Bradyrhizobium viridifuturi</i> SEMIA 690 <sup>T</sup>   | 96.99%   | -      | -           | 88.53%      | -             |
| <i>Bradyrhizobium embrapense</i> SEMIA 6208 <sup>T</sup>    | 96.99%   | 86.61% | 78.34%      | -           | 94.15%        |
| <i>Bradyrhizobium subterraneum</i> 58 2-1 <sup>T</sup>      | 99.51%   | 97.17% | -           | 93.09%      | 98.82%        |

|                                                                 |        |        |        |        |        |
|-----------------------------------------------------------------|--------|--------|--------|--------|--------|
| <i>Bradyrhizobium betae</i> LMG 21987 <sup>T</sup>              | 99.01% | 94.58% | -      | -      | 97.58% |
| <i>Bradyrhizobium canariense</i> BTA-1 <sup>T</sup>             | 99.10% | 95.69% | 65.71% | 83.85% | 97.97% |
| <i>Bradyrhizobium cytisi</i> CTAW11 <sup>T</sup>                | 99.01% | 94.94% | 68.72% | 83.32% | 97.75% |
| <i>Bradyrhizobium daqingense</i> CCBAU 15774 <sup>T</sup>       | 99.43% | 96.07% | 91.57% | 91.40% | 98.32% |
| <i>Bradyrhizobium denitrificans</i> LMG 8443 <sup>T</sup>       | 98.18% | 78.59% | -      | 85.01% | 92.44% |
| <i>Bradyrhizobium elkanii</i> USDA 76 <sup>T</sup>              | 96.73% | 88.28% | 80.49% | 89.17% | 94.45% |
| <i>Bradyrhizobium erythrophlei</i> CCBAU 53325 <sup>T</sup>     | 96.99% | 89.04% | 71.20% | 88.04% | 94.87% |
| <i>Bradyrhizobium ferriligni</i> CCBAU 51502 <sup>T</sup>       | 94.89% | 86.82% | 81.03% | 89.63% | 92.67% |
| <i>Bradyrhizobium ganzhouense</i> RITF806 <sup>T</sup>          | 99.18% | -      | 63.98% | 85.38% | -      |
| <i>Bradyrhizobium guangdongense</i> CCBAU 51649 <sup>T</sup>    | 99.26% | -      | -      | 82.43% | -      |
| <i>Bradyrhizobium guangxiense</i> CCBAU 53363 <sup>T</sup>      | 99.18% | -      | -      | 85.58% | -      |
| <i>Bradyrhizobium huanghuaihaiense</i> CCBAU 23303 <sup>T</sup> | 98.68% | 97.17% | 91.57% | 91.40% | 98.15% |
| <i>Bradyrhizobium icense</i> LMTR 13 <sup>T</sup>               | 96.90% | -      | 68.99% | 85.71% | -      |
| <i>Bradyrhizobium ingae</i> BR 10250 <sup>T</sup>               | 98.35% | -      | 63.82% | -      | -      |
| <i>Bradyrhizobium iriomotense</i> EK05 <sup>T</sup>             | 98.35% | 95.51% | 63.34% | -      | 97.46% |
| <i>Bradyrhizobium japonicum</i> USDA 6 <sup>T</sup>             | 99.43% | 95.34% | 91.57% | 91.40% | 98.09% |
| <i>Bradyrhizobium jicamae</i> PAC 68 <sup>T</sup>               | 96.65% | 88.04% | 64.54% | -      | 94.33% |
| <i>Bradyrhizobium kavangense</i> 14-3 <sup>T</sup>              | 98.93% | 97.34% | 85.72% | -      | 98.43% |

|                                                             |        |        |        |        |        |
|-------------------------------------------------------------|--------|--------|--------|--------|--------|
| <i>Bradyrhizobium lablabi</i> CCBAU 23086 <sup>T</sup>      | 96.82% | 87.25% | 69.66% | 85.73% | 94.21% |
| <i>Bradyrhizobium liaoningense</i> LMG 18230 <sup>T</sup>   | 99.51% | 95.51% | 59.52% | 91.40% | -      |
| <i>Bradyrhizobium manausense</i> BR 3351 <sup>T</sup>       | 99.18% | 96.25% | 63.77% | 81.61% | 98.26% |
| <i>Bradyrhizobium oligotrophicum</i> LMG 10732 <sup>T</sup> | 98.43% | 76.86% | -      | 84.87% | 92.25% |
| <i>Bradyrhizobium ottawaense</i> OO 99 <sup>T</sup>         | 99.34% | 95.69% | 91.57% | 91.40% | 98.15% |
| <i>Bradyrhizobium pachyrhizi</i> PAC 48 <sup>T</sup>        | 96.82% | 87.43% | 81.35% | -      | 94.27% |
| <i>Bradyrhizobium paxllaeri</i> LMTR 21 <sup>T</sup>        | 96.90% | 87.01% | 69.63% | 85.73% | 94.21% |
| <i>Bradyrhizobium retamae</i> Ro 19 <sup>T</sup>            | 97.24% | 86.76% | 68.56% | 86.14% | 94.38% |
| <i>Bradyrhizobium rifense</i> CTAW 71 <sup>T</sup>          | 99.10% | 94.74% | 67.53% | 83.38% | 97.69% |
| <i>Bradyrhizobium valentinum</i> LmjM3                      | 96.82% | -      | 68.85% | 86.21% | -      |
| <i>Bradyrhizobium vignae</i> 7-2 <sup>T</sup>               | 99.01% | 97.88% | 85.70% | -      | -      |
| <i>Bradyrhizobium tropiciagri</i> SEMIA 6148 <sup>T</sup>   | 96.21% | 87.38% | 80.58% | 88.08% | 93.84% |
| <i>Bradyrhizobium diazoefficiens</i> USDA 110 <sup>T</sup>  | 99.01% | 94.20% | 91.57% | 91.40% | 97.52% |
| <i>Bradyrhizobium neotropicale</i> BR 10247 <sup>T</sup>    | 96.39% | 95.34% | 62.87% | -      | -      |
| <i>Microvirga vignae</i> BR 3299 <sup>T</sup>               | 90.47% | -      | -      | -      | -      |

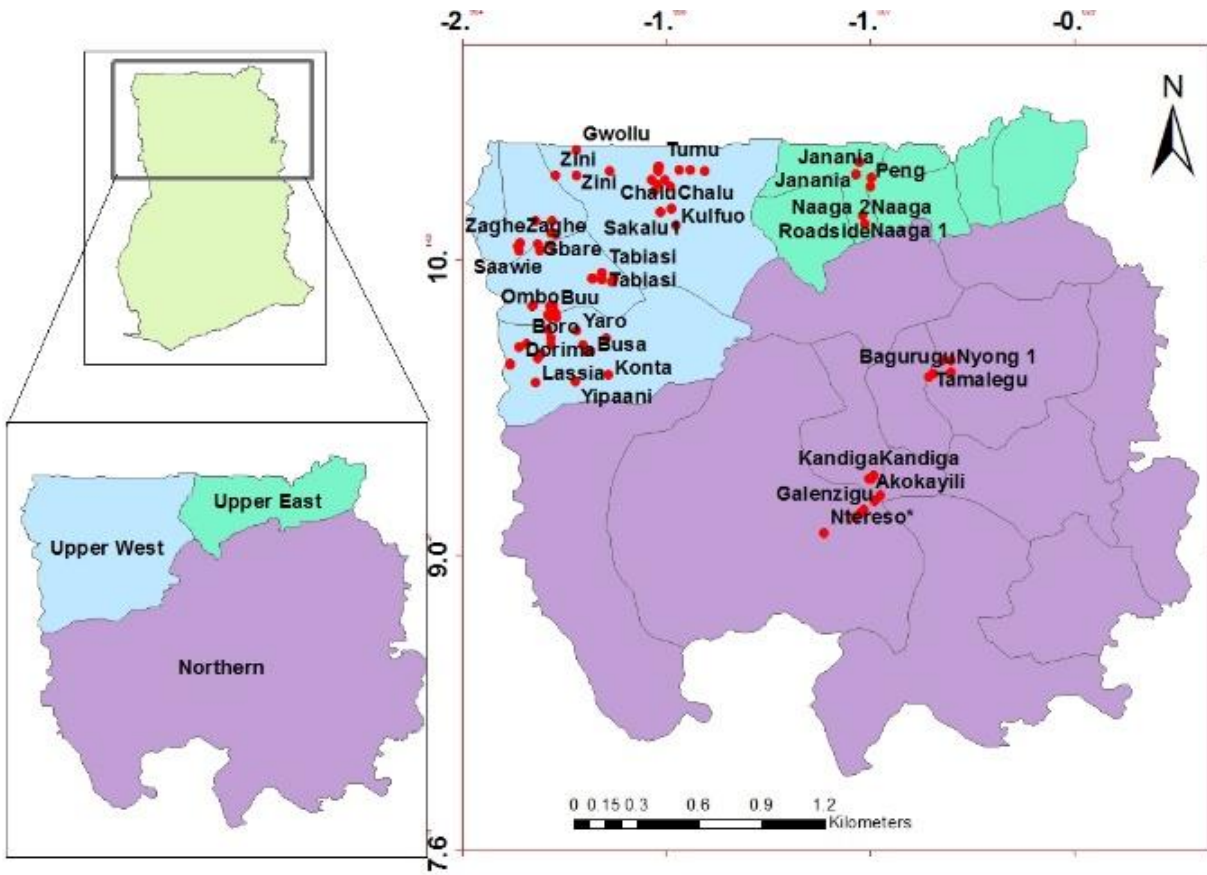

**Fig. S1.** Locations of cowpea and groundnut nodule sampling sites in northern Ghana representing the major legume growing areas.



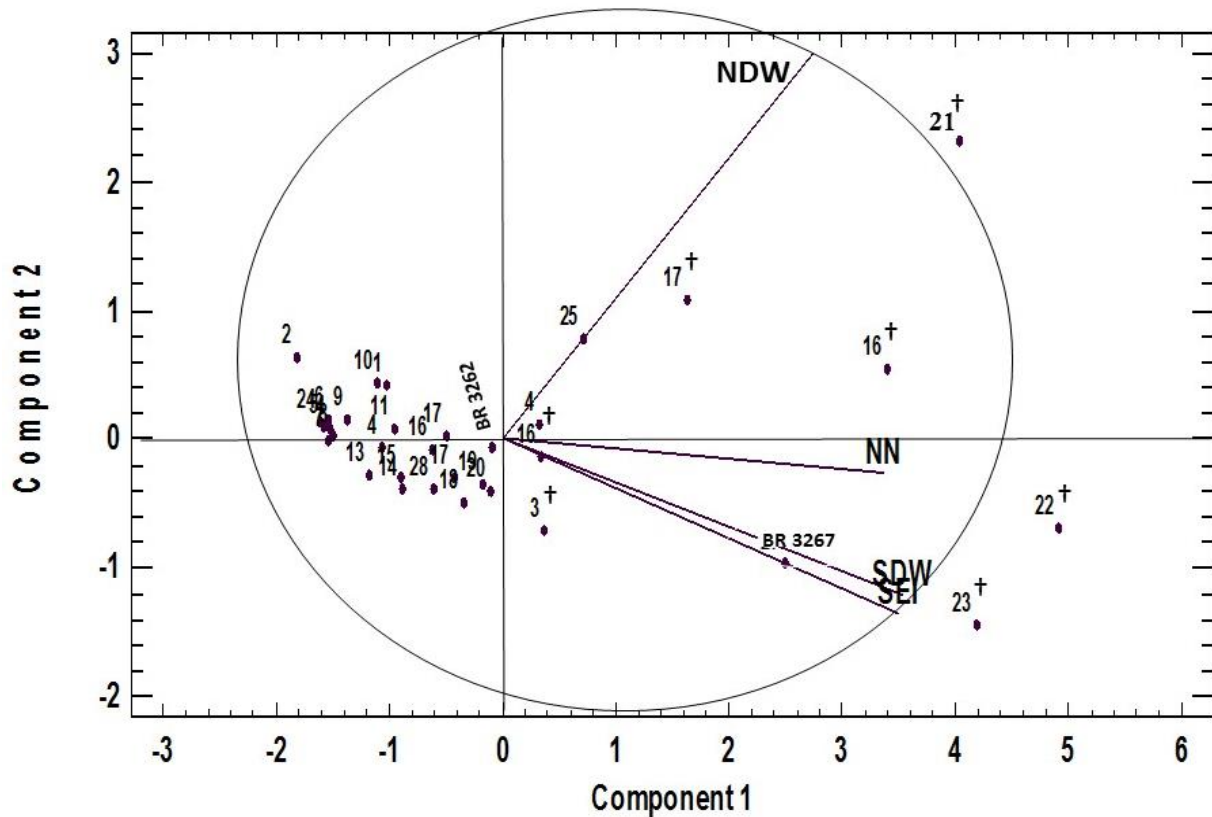

**Fig. S2.** Principal component analysis for the relationships among sampling sites as sources of effective or ineffective isolates. Reference strains *Bradyrhizobium yuanmingense* strain BR 3267 and *Bradyrhizobium pachyrhizi* strain BR 3262 represent sources of good performing strains. Numbers represent sampling sites: 1- Tamale; 2- Gbare; 3- Akokayilli; 4- Kandiga; 5- Naaga; 6- Pishegu; 7- Chiatanga; 8- Punyoro; 9- Dorima; 10- Varimpere; 11- Tabiasi; 12- Kandiga; 13- Tabiasi4 14- Varimpere 2; 15- Kuncheni; 16- Kandiga 2; 17- Boro; 18- Zaguo daryiri; 19- Zaguo daryiri; 20- Saawie; 21- Punyoro kb; 22- Konta; 23- Yipaani; 24- Tabiasi 2; 25- Kpalga.

† Isolates selected for second experiment. SDW: shoot dry weight, NN: nodule number, NDW: nodule dry weight, SEI: symbiotic effectiveness index

Fig S3a.

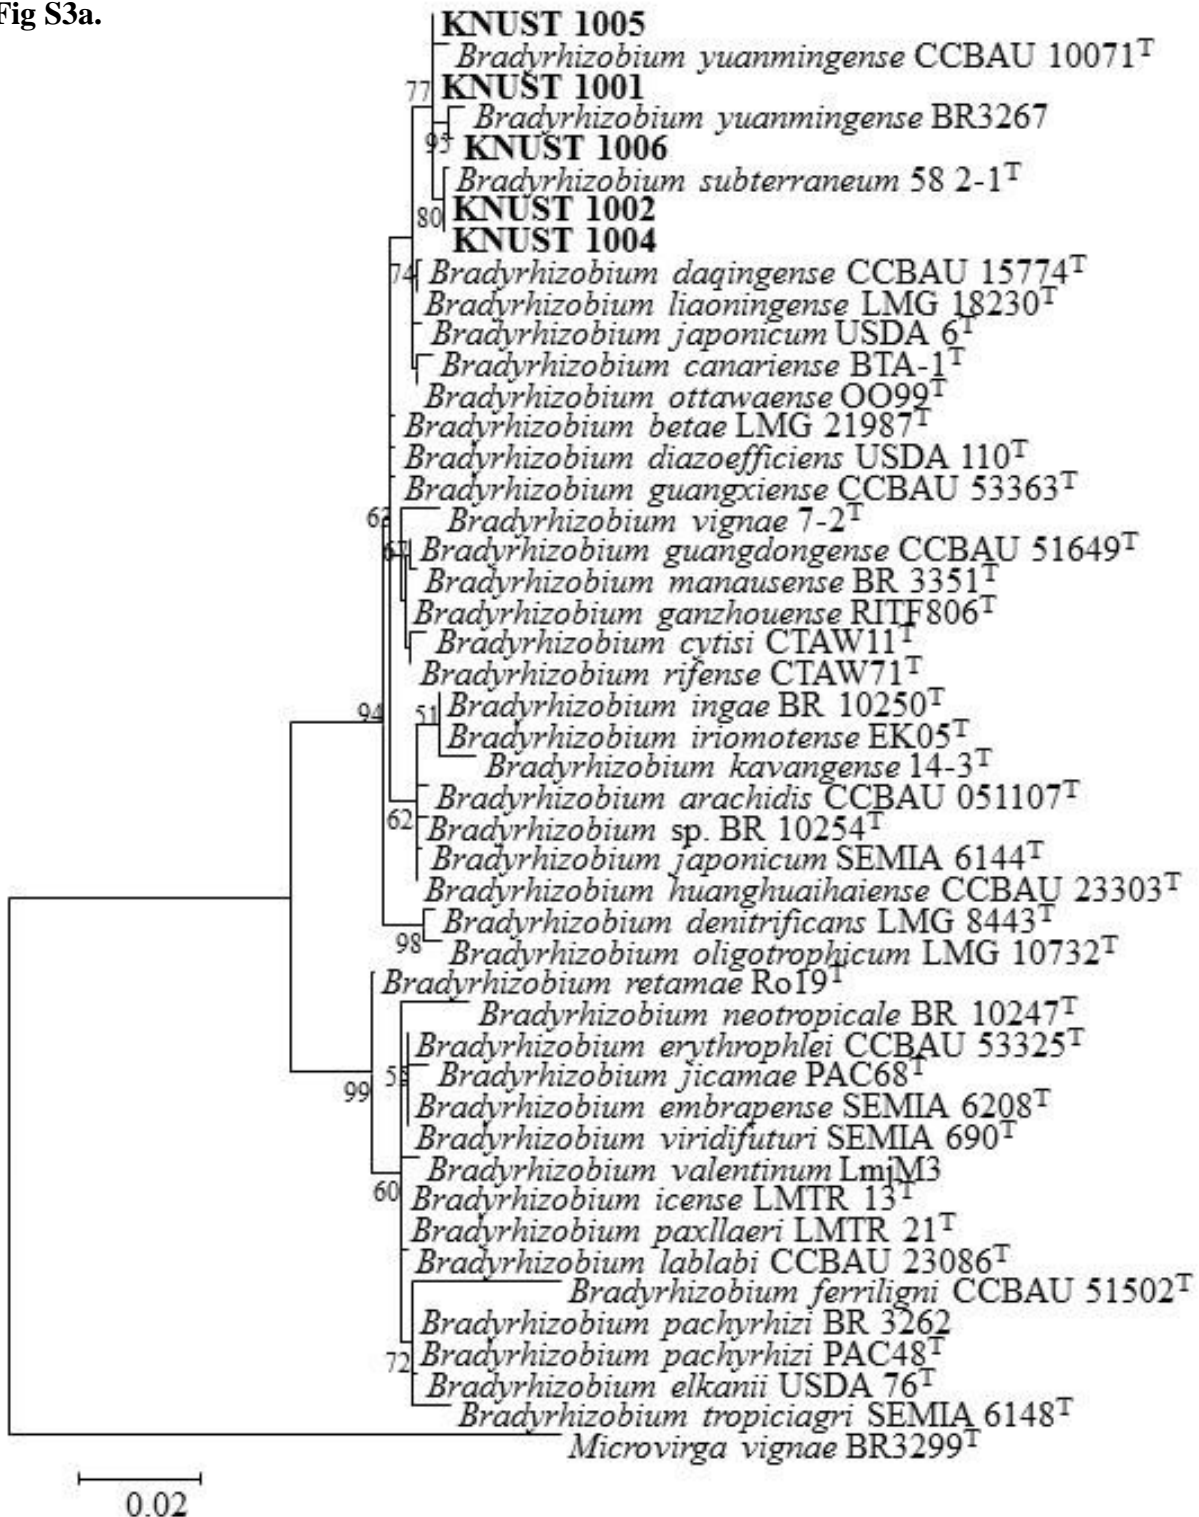

Fig S3b.

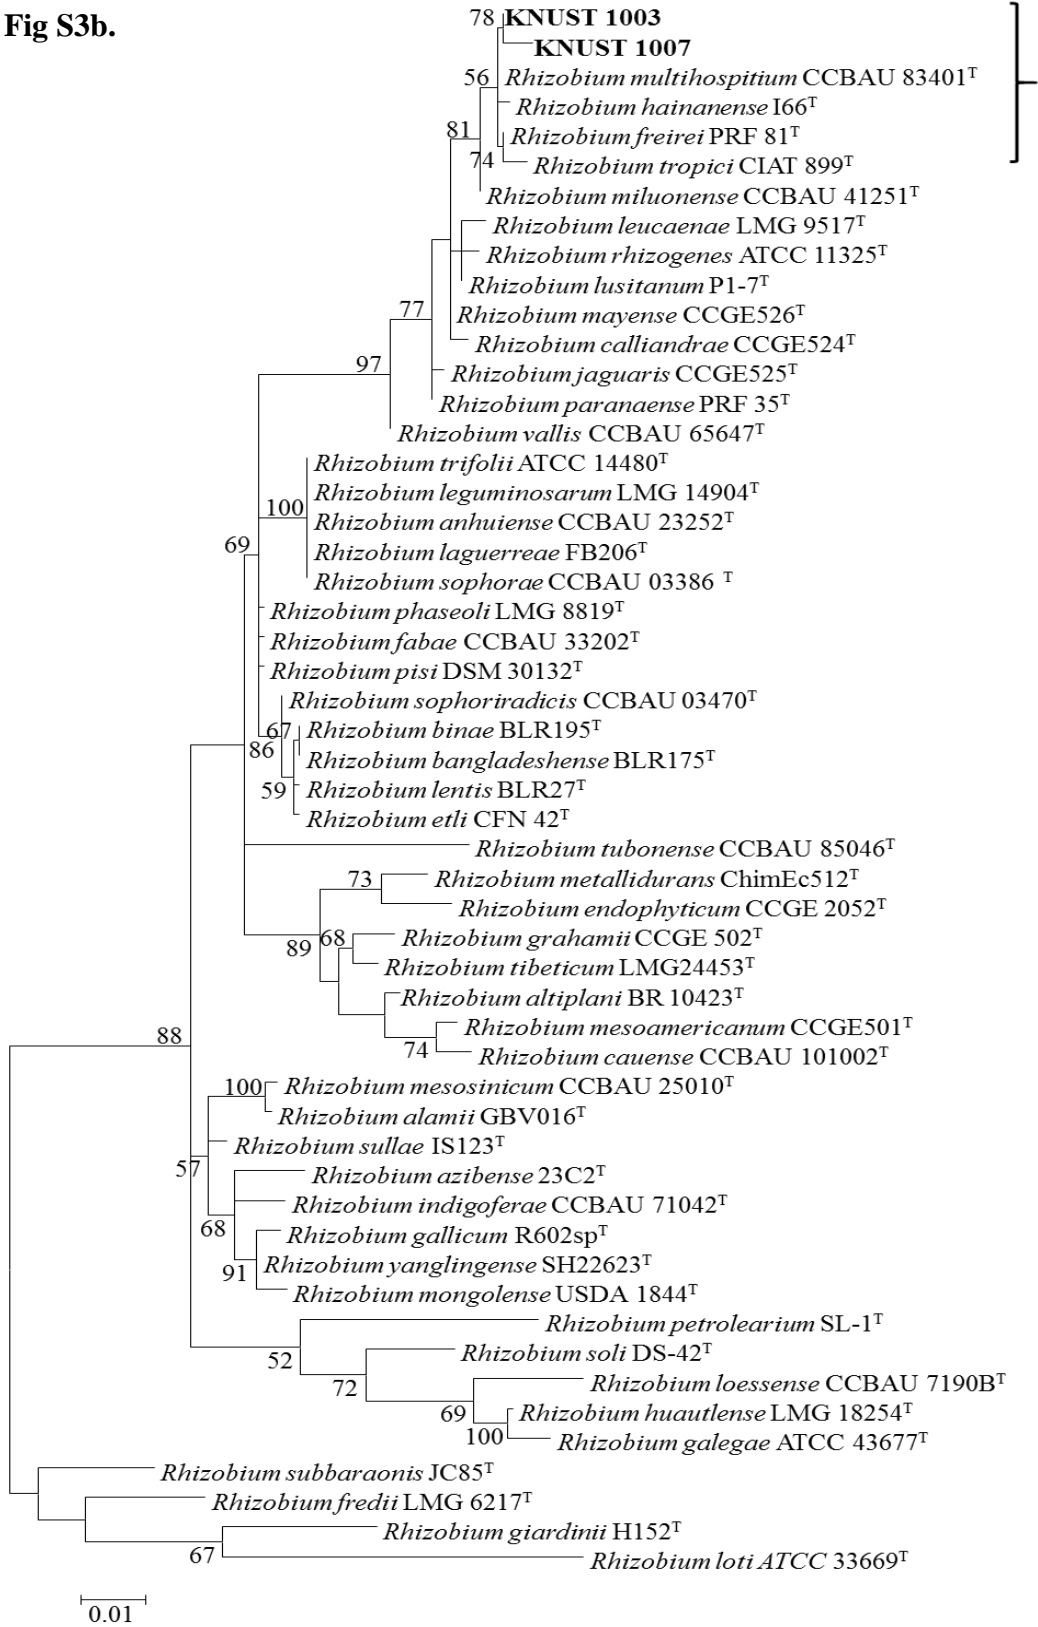

**Fig. S3.** Maximum likelihood phylogenetic tree based on 16S rRNA gene showing relationships between isolates, type species (<sup>T</sup>) and reference strains of the genera *Bradyrhizobium* (a) and *Rhizobium* (b). The phylogenetic tree was built based on the Tamura 3-parameter model. Bootstrap values were inferred from 500 replicates and are indicated at the tree nodes when  $\geq 50\%$ . The bar represents two or one estimated substitutions per 100 nucleotide positions.

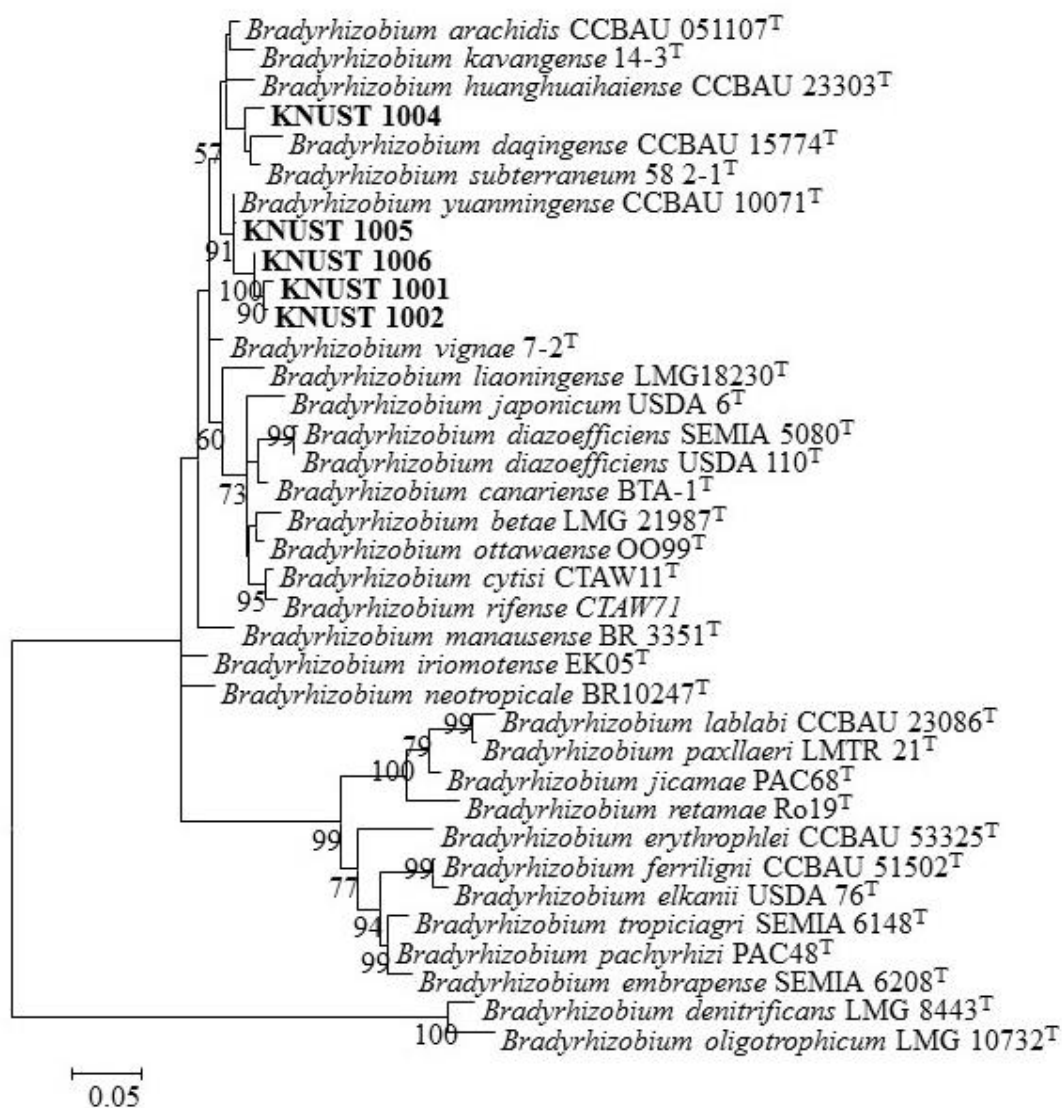

**Fig. S4.** Maximum likelihood phylogenetic tree based on ITS region showing relationships between isolates, type species (<sup>T</sup>) and reference strains of the genus *Bradyrhizobium*. The phylogenetic tree was built based on the Kimura 2-parameter model. Bootstrap values were inferred from 500 replicates and are indicated at the tree nodes when  $\geq 50\%$ . The bar represents five or two estimated substitutions per 100 nucleotide positions.
